# Supplementary material for: The Khorana score for prediction of venous thromboembolism in cancer patients: a systematic review and meta-analysis
Source: PubMed Central journal article supplement — Haematologica. 2019 Jan 3;104(6):1277–87. doi: 10.3324/haematol.2018.209114 (PMC6545838; doi:10.3324/haematol.2018.209114), 2019-06
Supplement: 2018_209114_MULDER_SUPPL.pdf [file 2018_209114_MULDER_SUPPL.pdf]

## The Khorana score for prediction of venous thromboembolism in cancer patients: a systematic review and meta-analysis

Frits I. Mulder,<sup>1,2</sup> Matteo Candeloro,<sup>3</sup> Pieter W. Kamphuisen,<sup>1</sup> Marcello Di Nisio,<sup>3</sup> Patrick M. Bossuyt,<sup>2</sup> Noori Guman,<sup>2</sup> Kirsten Smit,<sup>2</sup> Harry R. Büller,<sup>2</sup> and Nick van Es<sup>2</sup> on behalf of the CAT-prediction collaborators

<sup>1</sup>Tergooi Hospitals, Department of Internal Medicine, Hilversum, the Netherlands; <sup>2</sup>Amsterdam UMC, University of Amsterdam, Department of Vascular Medicine, Amsterdam Cardiovascular Science, Amsterdam, the Netherlands; <sup>3</sup>University G. D'Annunzio, Department of Medicine and Ageing Sciences, Chieti, Italy

©2019 Ferrata Storti Foundation. This is an open-access paper. doi:10.3324/haematol.2018.209114

Received: October 12, 2018.

Accepted: January 2, 2019.

Pre-published: January 3, 2019.

Correspondence: FRITS I. MULDER - f.i.mulder@amc.nl

---

**Supplementary Table 1. Preferred Reporting Items for Systematic Reviews and Meta-Analyses (PRISMA)**

| Section/topic                      | #  | Checklist item                                                                                                                                                                                                                                                                                              | Reported on page # |
|------------------------------------|----|-------------------------------------------------------------------------------------------------------------------------------------------------------------------------------------------------------------------------------------------------------------------------------------------------------------|--------------------|
| <b>TITLE</b>                       |    |                                                                                                                                                                                                                                                                                                             |                    |
| Title                              | 1  | Identify the report as a systematic review, meta-analysis, or both.                                                                                                                                                                                                                                         | 1                  |
| <b>ABSTRACT</b>                    |    |                                                                                                                                                                                                                                                                                                             |                    |
| Structured summary                 | 2  | Provide a structured summary including, as applicable: background; objectives; data sources; study eligibility criteria, participants, and interventions; study appraisal and synthesis methods; results; limitations; conclusions and implications of key findings; systematic review registration number. | 3                  |
| <b>INTRODUCTION</b>                |    |                                                                                                                                                                                                                                                                                                             |                    |
| Rationale                          | 3  | Describe the rationale for the review in the context of what is already known.                                                                                                                                                                                                                              | 4                  |
| Objectives                         | 4  | Provide an explicit statement of questions being addressed with reference to participants, interventions, comparisons, outcomes, and study design (PICOS).                                                                                                                                                  | 5                  |
| <b>METHODS</b>                     |    |                                                                                                                                                                                                                                                                                                             |                    |
| Protocol and registration          | 5  | Indicate if a review protocol exists, if and where it can be accessed (e.g., Web address), and, if available, provide registration information including registration number.                                                                                                                               | 5                  |
| Eligibility criteria               | 6  | Specify study characteristics (e.g., PICOS, length of follow-up) and report characteristics (e.g., years considered, language, publication status) used as criteria for eligibility, giving rationale.                                                                                                      | 5                  |
| Information sources                | 7  | Describe all information sources (e.g., databases with dates of coverage, contact with study authors to identify additional studies) in the search and date last searched.                                                                                                                                  | 5                  |
| Search                             | 8  | Present full electronic search strategy for at least one database, including any limits used, such that it could be repeated.                                                                                                                                                                               | 27                 |
| Study selection                    | 9  | State the process for selecting studies (i.e., screening, eligibility, included in systematic review, and, if applicable, included in the meta-analysis).                                                                                                                                                   | 5-8                |
| Data collection process            | 10 | Describe method of data extraction from reports (e.g., piloted forms, independently, in duplicate) and any processes for obtaining and confirming data from investigators.                                                                                                                                  | 5-8                |
| Data items                         | 11 | List and define all variables for which data were sought (e.g., PICOS, funding sources) and any assumptions and simplifications made.                                                                                                                                                                       | 5-8                |
| Risk of bias in individual studies | 12 | Describe methods used for assessing risk of bias of individual studies (including specification of whether this was done at the study or outcome level), and how this information is to be used in any data synthesis.                                                                                      | 5-8                |
| Summary measures                   | 13 | State the principal summary measures (e.g., risk ratio, difference in means).                                                                                                                                                                                                                               | 5-8                |
| Synthesis of results               | 14 | Describe the methods of handling data and combining results of studies, if done, including measures of consistency (e.g., $I^2$ ) for each meta-analysis.                                                                                                                                                   | 5-8                |
| Risk of bias across studies        | 15 | Specify any assessment of risk of bias that may affect the cumulative evidence (e.g., publication bias, selective reporting within studies).                                                                                                                                                                | 5-8                |
| Additional analyses                | 16 | Describe methods of additional analyses (e.g., sensitivity or subgroup analyses, meta-regression), if done, indicating which were pre-specified.                                                                                                                                                            | 5-8                |
| <b>RESULTS</b>                     |    |                                                                                                                                                                                                                                                                                                             |                    |
| Study selection                    | 17 | Give numbers of studies screened, assessed for eligibility, and included in the review, with reasons for exclusions at each stage, ideally with a flow diagram.                                                                                                                                             | 8                  |
| Study characteristics              | 18 | For each study, present characteristics for which data were extracted (e.g., study size, PICOS, follow-up period) and provide the citations.                                                                                                                                                                | 9                  |
| Risk of bias within studies        | 19 | Present data on risk of bias of each study and, if available, any outcome level assessment (see item 12).                                                                                                                                                                                                   | 9                  |

|                               |    |                                                                                                                                                                                                          |       |
|-------------------------------|----|----------------------------------------------------------------------------------------------------------------------------------------------------------------------------------------------------------|-------|
| Results of individual studies | 20 | For all outcomes considered (benefits or harms), present, for each study: (a) simple summary data for each intervention group (b) effect estimates and confidence intervals, ideally with a forest plot. | 9-11  |
| Synthesis of results          | 21 | Present results of each meta-analysis done, including confidence intervals and measures of consistency.                                                                                                  | 9-11  |
| Risk of bias across studies   | 22 | Present results of any assessment of risk of bias across studies (see Item 15).                                                                                                                          | 9-11  |
| Additional analysis           | 23 | Give results of additional analyses, if done (e.g., sensitivity or subgroup analyses, meta-regression [see Item 16]).                                                                                    | 11    |
| <b>DISCUSSION</b>             |    |                                                                                                                                                                                                          |       |
| Summary of evidence           | 24 | Summarize the main findings including the strength of evidence for each main outcome; consider their relevance to key groups (e.g., healthcare providers, users, and policy makers).                     | 11-14 |
| Limitations                   | 25 | Discuss limitations at study and outcome level (e.g., risk of bias), and at review-level (e.g., incomplete retrieval of identified research, reporting bias).                                            | 11-14 |
| Conclusions                   | 26 | Provide a general interpretation of the results in the context of other evidence, and implications for future research.                                                                                  | 11-14 |
| <b>FUNDING</b>                |    |                                                                                                                                                                                                          |       |
| Funding                       | 27 | Describe sources of funding for the systematic review and other support (e.g., supply of data); role of funders for the systematic review.                                                               | 2     |

**Supplementary Table 2.** Search strategy on MEDLINE and EMBASE, 7 June 2018**MEDLINE**

|     |                                                                                                                                                                                                                                                           |
|-----|-----------------------------------------------------------------------------------------------------------------------------------------------------------------------------------------------------------------------------------------------------------|
| 1.  | neoplasms[mesh] OR neoplas*[tiab] OR cancer*[tiab] OR malign*[tiab] OR tumor*[tiab] OR tumour*[tiab]<br>(N=3833328)                                                                                                                                       |
| 2.  | "Venous Thromboembolism"[Mesh] OR "venous thromboembolism"[All fields] OR "Venous Thrombosis"[Mesh] OR "venous thrombosis"[All fields] OR "deep vein thrombosis"[All fields] OR "Pulmonary Embolism"[Mesh] OR "pulmonary embolism"[All fields] (N=111493) |
| 3.  | Khorana[All Fields] OR scor*[tiab] OR stratif*[tiab] OR predict*[tiab] (N=2083983)                                                                                                                                                                        |
| 4.  | 1 AND 2 AND 3 (N=2094)                                                                                                                                                                                                                                    |
| 5.  | "Infant"[Mesh] OR "infant"[MeSH Terms:noexp] OR "child"[MeSH Terms] OR "child"[MeSH Terms:noexp] OR infant,newborn[Mesh] OR child,preschool[Mesh] (N=2299792)                                                                                             |
| 6.  | 4 NOT 5 (N=2030)                                                                                                                                                                                                                                          |
| 7.  | Review[ptyp] OR meta-analysis[ptyp] OR editorial[ptyp] OR practice guideline[ptyp] OR case reports[ptyp]<br>(N=4649720)                                                                                                                                   |
| 8.  | 6 NOT 7 (N=1685)                                                                                                                                                                                                                                          |
| 9.  | "2008/01/01"[Date - Create] : "2019/01/01"[Date - Create] (N=10747919)                                                                                                                                                                                    |
| 10. | 8 AND 9 (N=1296)                                                                                                                                                                                                                                          |

**EMBASE**

|    |                                                                                                                                                                                                             |
|----|-------------------------------------------------------------------------------------------------------------------------------------------------------------------------------------------------------------|
| 1. | exp neoplasm/ or exp/ carcinoma or cancer\$.mp or tum*r\$.tw. or malign\$.tw. (N= 5326817)                                                                                                                  |
| 2. | exp Lung Embolism/ or pulmonary embolism*.mp. or lung embolism*.ti,ab. or pulmonary thromboembolism*.ti,ab. or exp Venous thrombosis/ or exp venous thromboembolism/ or deep vein thrombosis.mp. (N=206441) |
| 3. | Khorana.mp. or scor\$.tw. or stratif\$.tw. or predict\$.tw. or exp prediction/ (N= 2944162)                                                                                                                 |
| 4. | 1 and 2 and 3 (N=8031)                                                                                                                                                                                      |
| 5. | limit 4 to yr="2008 -Current" (N=7018)                                                                                                                                                                      |
| 6. | limit 5 to exclude medline journals (N=530)                                                                                                                                                                 |

**Supplementary Table 3.** Criteria used in QUIPS bias risk assessment tool

|                                             |                  |                                                                                                                                  |
|---------------------------------------------|------------------|----------------------------------------------------------------------------------------------------------------------------------|
| <b>Study participation</b>                  | Low              | Prospective study with adequately described inclusion and exclusion criteria.                                                    |
|                                             | moderate/unclear | Retrospective study with not adequately described criteria or unclear selection.                                                 |
|                                             | high             | Bias possible due to selection procedure                                                                                         |
| <b>Study attrition</b>                      | low              | Loss to follow-up was <5%                                                                                                        |
|                                             | moderate/unclear | Loss to follow-up not described                                                                                                  |
|                                             | high             | Loss to follow up >5%                                                                                                            |
| <b>Prognostic Factor measurement</b>        | low              | Khorana score determined for most of the population (>95%)                                                                       |
|                                             | moderate/unclear | Khorana score could not be calculated for >5%                                                                                    |
|                                             | high             | Khorana score could not be calculated for >10%                                                                                   |
| <b>Outcome measurement</b>                  | low              | Blind measurement by an independent assessor.                                                                                    |
|                                             | moderate/unclear | No blind measurement                                                                                                             |
|                                             | high             | No blind measurement, outcome ascertainment not reported and duration of follow-up not described.                                |
| <b>Confounding</b>                          | low              | Patients using thromboprophylaxis were excluded.                                                                                 |
|                                             | moderate         | Not described whether patients using thromboprophylaxis were excluded.                                                           |
|                                             | high             | >5% of the population received thromboprophylaxis.                                                                               |
| <b>Statistical analysis &amp; reporting</b> | low              | The selected statistical model is adequate for the design of the study. No selective reporting.                                  |
|                                             | moderate         | Not sufficient presentation of data to assess the adequacy of the analysis.                                                      |
|                                             | high             | Selective reporting, abstract                                                                                                    |
| <b>Applicability patient selection</b>      | low              | The study evaluated outpatients with cancer who started chemotherapy and did not receive thromboprophylaxis                      |
|                                             | moderate/unclear | Selected population                                                                                                              |
|                                             | high             | Chemotherapy was started before determination of the Khorana score. Selected population                                          |
| <b>Applicability Khorana score</b>          | low              | Khorana score applied without modifications                                                                                      |
|                                             | moderate/unclear | Modified Khorana score applied: tumor types added to the high risk and very high risk sites                                      |
|                                             | high             | Major modifications or unsure whether score was modified or not.                                                                 |
| <b>Applicability outcome</b>                | low              | LEDVT, UEDVT, PE and/or CSVT as outcome.                                                                                         |
|                                             | moderate/unclear | Superficial or abdominal thrombosis included. Unclear whether incidental was included. Unclear which types of VTE were included. |
|                                             | high             | Arterial thrombosis included.                                                                                                    |

**Supplementary Table 4. Bias risk assessment.†**

| Author              | Study outcome                     | Incidental VTE included | Patients that received anticoagulation included | Applicability patient selection | Applicability Khorana score | Applicability outcome | Study participation | Study attrition | Prognostic factor measurement | Outcome measurement | Confounding | Statistical analysis and reporting |
|---------------------|-----------------------------------|-------------------------|-------------------------------------------------|---------------------------------|-----------------------------|-----------------------|---------------------|-----------------|-------------------------------|---------------------|-------------|------------------------------------|
| Abdel-Razeq (2017)  | DVT, PE                           | No                      | No                                              | -*                              | -                           | -                     | ?                   | ?               | -                             | ?                   | -           | ?                                  |
| Ades (2015)         | DVT, PE                           | Yes                     | NR                                              | -                               | -                           | ?                     | ?                   | -               | ?                             | ?                   | ?           | +                                  |
| Austin (2017)       | DVT, PE, catheter-associated      | Yes                     | No                                              | ?                               | ?                           | ?                     | ?                   | -               | -                             | ?                   | ?           | +                                  |
| Ayyappan (2016)     | VTE                               | Yes                     | Yes                                             | ?                               | ?                           | ?                     | ?                   | -               | +                             | ?                   | +           | +                                  |
| Bezan               | DVT, PE, SVT                      | Yes                     | Yes (3.3%)                                      | ?                               | ?                           | ?                     | ?                   | -               | ?                             | ?                   | ?           | -                                  |
| Borchman (2016)     | DVT, PE, catheter-associated      | No                      | Yes (1%)                                        | ?                               | ?                           | ?                     | ?                   | ?               | ?                             | ?                   | ?           | +                                  |
| Cella (2017)        | DVT, PE, head/neck VTE            | Yes                     | No                                              | ?                               | -                           | -                     | -                   | ?               | -                             | ?                   | ?           | -                                  |
| Ferroni (2015)      | DVT, PE                           | Yes                     | No                                              | -                               | -                           | ?                     | -                   | ?               | -                             | ?                   | -           | -                                  |
| Ferroni (2012)      | DVT, PE                           | Yes                     | No                                              | ?                               | -                           | -                     | ?                   | -               | -                             | +                   | -           | -                                  |
| Fuentes (2017)      | DVT, PE                           | Yes                     | No                                              | ?                               | -                           | -                     | -                   | -               | -                             | ?                   | -           | -                                  |
| George (2011)       | DVT, PE                           | Yes                     | No                                              | -                               | -                           | -                     | -                   | -               | -                             | -                   | -           | -                                  |
| Guadagni (2017)     | DVT, PE, catheter-associated      | Yes                     | No                                              | ?                               | ?                           | ?                     | -                   | -               | -                             | ?                   | -           | -                                  |
| Kearney (2009)      | VTE                               | NR                      | NR                                              | -                               | -                           | ?                     | ?                   | ?               | -                             | +                   | -           | +                                  |
| Khorana (2017)      | VTE                               | Yes                     | No                                              | ?                               | -                           | ?                     | -                   | -               | -                             | -                   | -           | -                                  |
| Khorana (2014)      | DVT, PE                           | Yes                     | No                                              | ?                               | -                           | ?                     | -                   | -               | -                             | -                   | -           | -                                  |
| Khorana (2008)      | DVT, PE                           | No                      | No                                              | -                               | -                           | ?                     | -                   | -               | -                             | ?                   | -           | -                                  |
| Kim (2012)          | DVT, PE                           | NR                      | Yes                                             | ?                               | -                           | ?                     | ?                   | -               | -                             | +                   | -           | -                                  |
| Kruger (2017)       | DVT, PE                           | No                      | No                                              | +                               | -                           | ?                     | ?                   | -               | +                             | ?                   | -           | -                                  |
| Kuderer (2017)      | DVT, PE, SVT, catheter-associated | Yes                     | NR                                              | ?                               | -                           | ?                     | -                   | ?               | +                             | ?                   | ?           | -                                  |
| Kuk (2017)          | NR                                | NR                      | No                                              | -                               | -                           | +                     | +                   | -               | -                             | +                   | -           | +                                  |
| Kunapareddy (2017)  | NR                                | NR                      | NR                                              | ?                               | -                           | ?                     | -                   | ?               | -                             | ?                   | ?           | +                                  |
| Lim (2015)          | DVT, PE                           | Yes                     | No                                              | ?                               | -                           | ?                     | +                   | ?               | -                             | ?                   | -           | -                                  |
| Lubberts (2016)     | DVT, PE                           | Yes                     | No                                              | -                               | -                           | -                     | -                   | +               | -                             | ?                   | -           | +                                  |
| Lustig (2015)       | DVT, PE                           | Yes                     | No                                              | ?                               | +                           | ?                     | -                   | ?               | -                             | ?                   | -           | -                                  |
| Mandala (2012)      | DVT, PE, SVT                      | No                      | Yes                                             | ?                               | -                           | ?                     | -                   | ?               | -                             | ?                   | ?           | -                                  |
| Mansfield (2016)    | DVT, PE, SVT                      | Yes                     | No                                              | -                               | -                           | ?                     | -                   | -               | ?                             | ?                   | -           | -                                  |
| Misch (2013)        | DVT, PE, head/neck VTE            | No                      | Yes                                             | +                               | ?                           | ?                     | +                   | ?               | -                             | +                   | -           | -                                  |
| Moore (2011)        | DVT, PE, head/neck VTE            | Yes                     | NR                                              | ?                               | ?                           | ?                     | +                   | ?               | -                             | ?                   | ?           | -                                  |
| Munoz-Martin (2017) | DVT, PE, head/neck VTE            | NR                      | No                                              | -                               | -                           | -                     | -                   | -               | -                             | ?                   | -           | -                                  |
| Munoz-Martin (2014) | DVT, PE, SVT                      | Yes                     | No                                              | ?                               | -                           | ?                     | ?                   | ?               | -                             | ?                   | -           | -                                  |
| Noble (2015)        | DVT, PE, ATE                      | Yes                     | No                                              | -                               | -                           | -                     | -                   | -               | -                             | ?                   | -           | -                                  |
| Panizo (2015)       | DVT, PE, SVT                      | Yes                     | Yes                                             | +                               | ?                           | ?                     | -                   | ?               | -                             | ?                   | -           | -                                  |
| Papaxoinis (2018)   | DVT, PE                           | Yes                     | No                                              | -                               | -                           | ?                     | -                   | -               | -                             | ?                   | -           | -                                  |
| Park (2017)         | DVT, PE                           | Yes                     | No                                              | -                               | -                           | -                     | -                   | -               | ?                             | ?                   | -           | ?                                  |
| Patel (2015)        | DVT, PE                           | Yes                     | No                                              | ?                               | -                           | ?                     | -                   | ?               | -                             | ?                   | ?           | -                                  |
| Pelzer (2013)       | DVT, PE                           | No                      | No                                              | -                               | -                           | -                     | -                   | ?               | ?                             | -                   | ?           | -                                  |
| Petitto (2017)      | NR                                | NR                      | No                                              | ?                               | -                           | ?                     | ?                   | ?               | -                             | ?                   | ?           | +                                  |
| Posch (2016)        | DVT, PE                           | Yes                     | NR                                              | -                               | -                           | -                     | -                   | ?               | -                             | ?                   | ?           | -                                  |
| Ramos (2016)        | DVT, PE, catheter-associated      | NR                      | NR                                              | ?                               | -                           | ?                     | ?                   | -               | -                             | ?                   | -           | -                                  |
| Ruch (2012)         | DVT, PE, SVT                      | NR                      | Yes                                             | ?                               | -                           | ?                     | ?                   | ?               | -                             | ?                   | ?           | +                                  |
| Rupa-Matysek (2018) | DVT, PE, SVT, head/neck VTE       | No                      | No                                              | -                               | -                           | ?                     | ?                   | -               | -                             | ?                   | -           | -                                  |
| Rupa-Matysek (2018) | DVT, PE                           | NR                      | Yes                                             | -                               | -                           | -                     | ?                   | -               | -                             | ?                   | +           | -                                  |
| Santi (2017)        | DVT, PE                           | NR                      | Yes (6%)                                        | ?                               | -                           | -                     | -                   | ?               | ?                             | ?                   | ?           | -                                  |
| Sohal (2016)        | DVT, PE, SVT, catheter-associated | Yes                     | Yes                                             | ?                               | -                           | ?                     | ?                   | ?               | ?                             | ?                   | +           | +                                  |
| Srikanthan (2015)   | DVT, PE                           | NR                      | No                                              | -                               | ?                           | ?                     | ?                   | -               | -                             | ?                   | -           | -                                  |
| Tafur (2015)        | DVT, PE, SVT                      | Yes                     | No                                              | -                               | -                           | -                     | -                   | ?               | -                             | -                   | -           | -                                  |
| van Es (2017)       | DVT, PE                           | Yes                     | No                                              | +                               | -                           | -                     | -                   | -               | -                             | -                   | -           | -                                  |
| van Es (2017)       | DVT, PE                           | Yes                     | No                                              | ?                               | -                           | -                     | ?                   | -               | -                             | ?                   | -           | -                                  |
| Vathiotis (2018)    | DVT, PE                           | Yes                     | No                                              | ?                               | -                           | -                     | ?                   | -               | -                             | ?                   | -           | -                                  |
| Verso (2012)        | DVT, PE, SVT, ATE                 | No                      | No                                              | -                               | -                           | +                     | -                   | +               | -                             | -                   | -           | -                                  |
| Wang (2017)         | DVT, PE, SVT                      | Yes                     | No                                              | ?                               | -                           | ?                     | -                   | -               | -                             | -                   | ?           | -                                  |
| Yust-Katz (2015)    | DVT, PE, head/neck VTE            | No                      | Yes                                             | ?                               | ?                           | -                     | +                   | ?               | -                             | ?                   | +           | -                                  |
| Zahir (2017)        | DVT, PE                           | Yes                     | No                                              | -                               | -                           | -                     | -                   | -               | -                             | ?                   | -           | +                                  |

\*: low risk of bias, ?: moderate/unclear risk of bias, +; high risk of bias Abbreviations: VTE, venous thromboembolism; DVT, deep-venous thrombosis; PE, pulmonary embolism; SVT, splanchnic vein thrombosis; ATE, arterial thromboembolism; NR, not reported. † bias assessment can be altered than original report if additional data was acquired.

**Supplementary Figures**

**Supplementary Figure 1.** Funnel plot of risk ratio of venous thromboembolic events in the Khorana score high-risk group versus the lower risk groups for all individual studies.

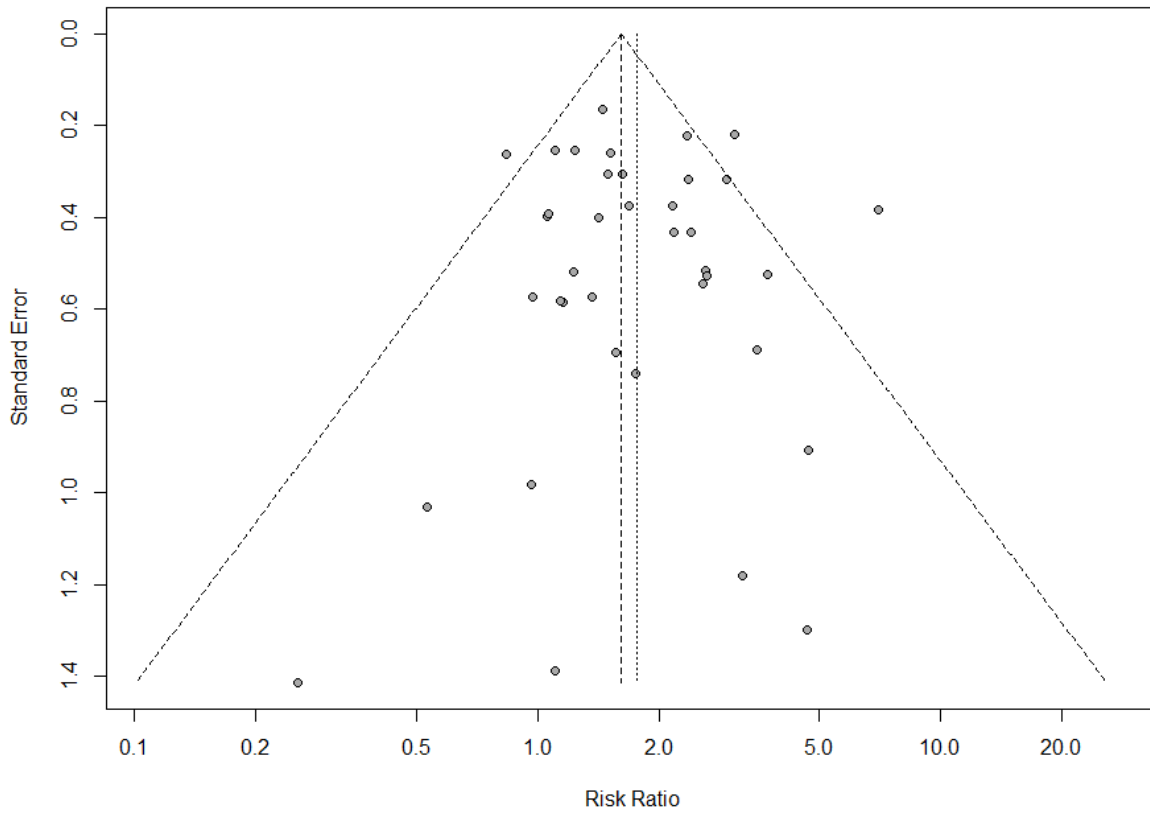

**Supplementary Figure 2.** Relative risk of VTE incidence with 95% confidence intervals in high-risk group (Khorana score  $\geq 3$ ) versus low- and intermediate-risk groups during 6-month follow-up.

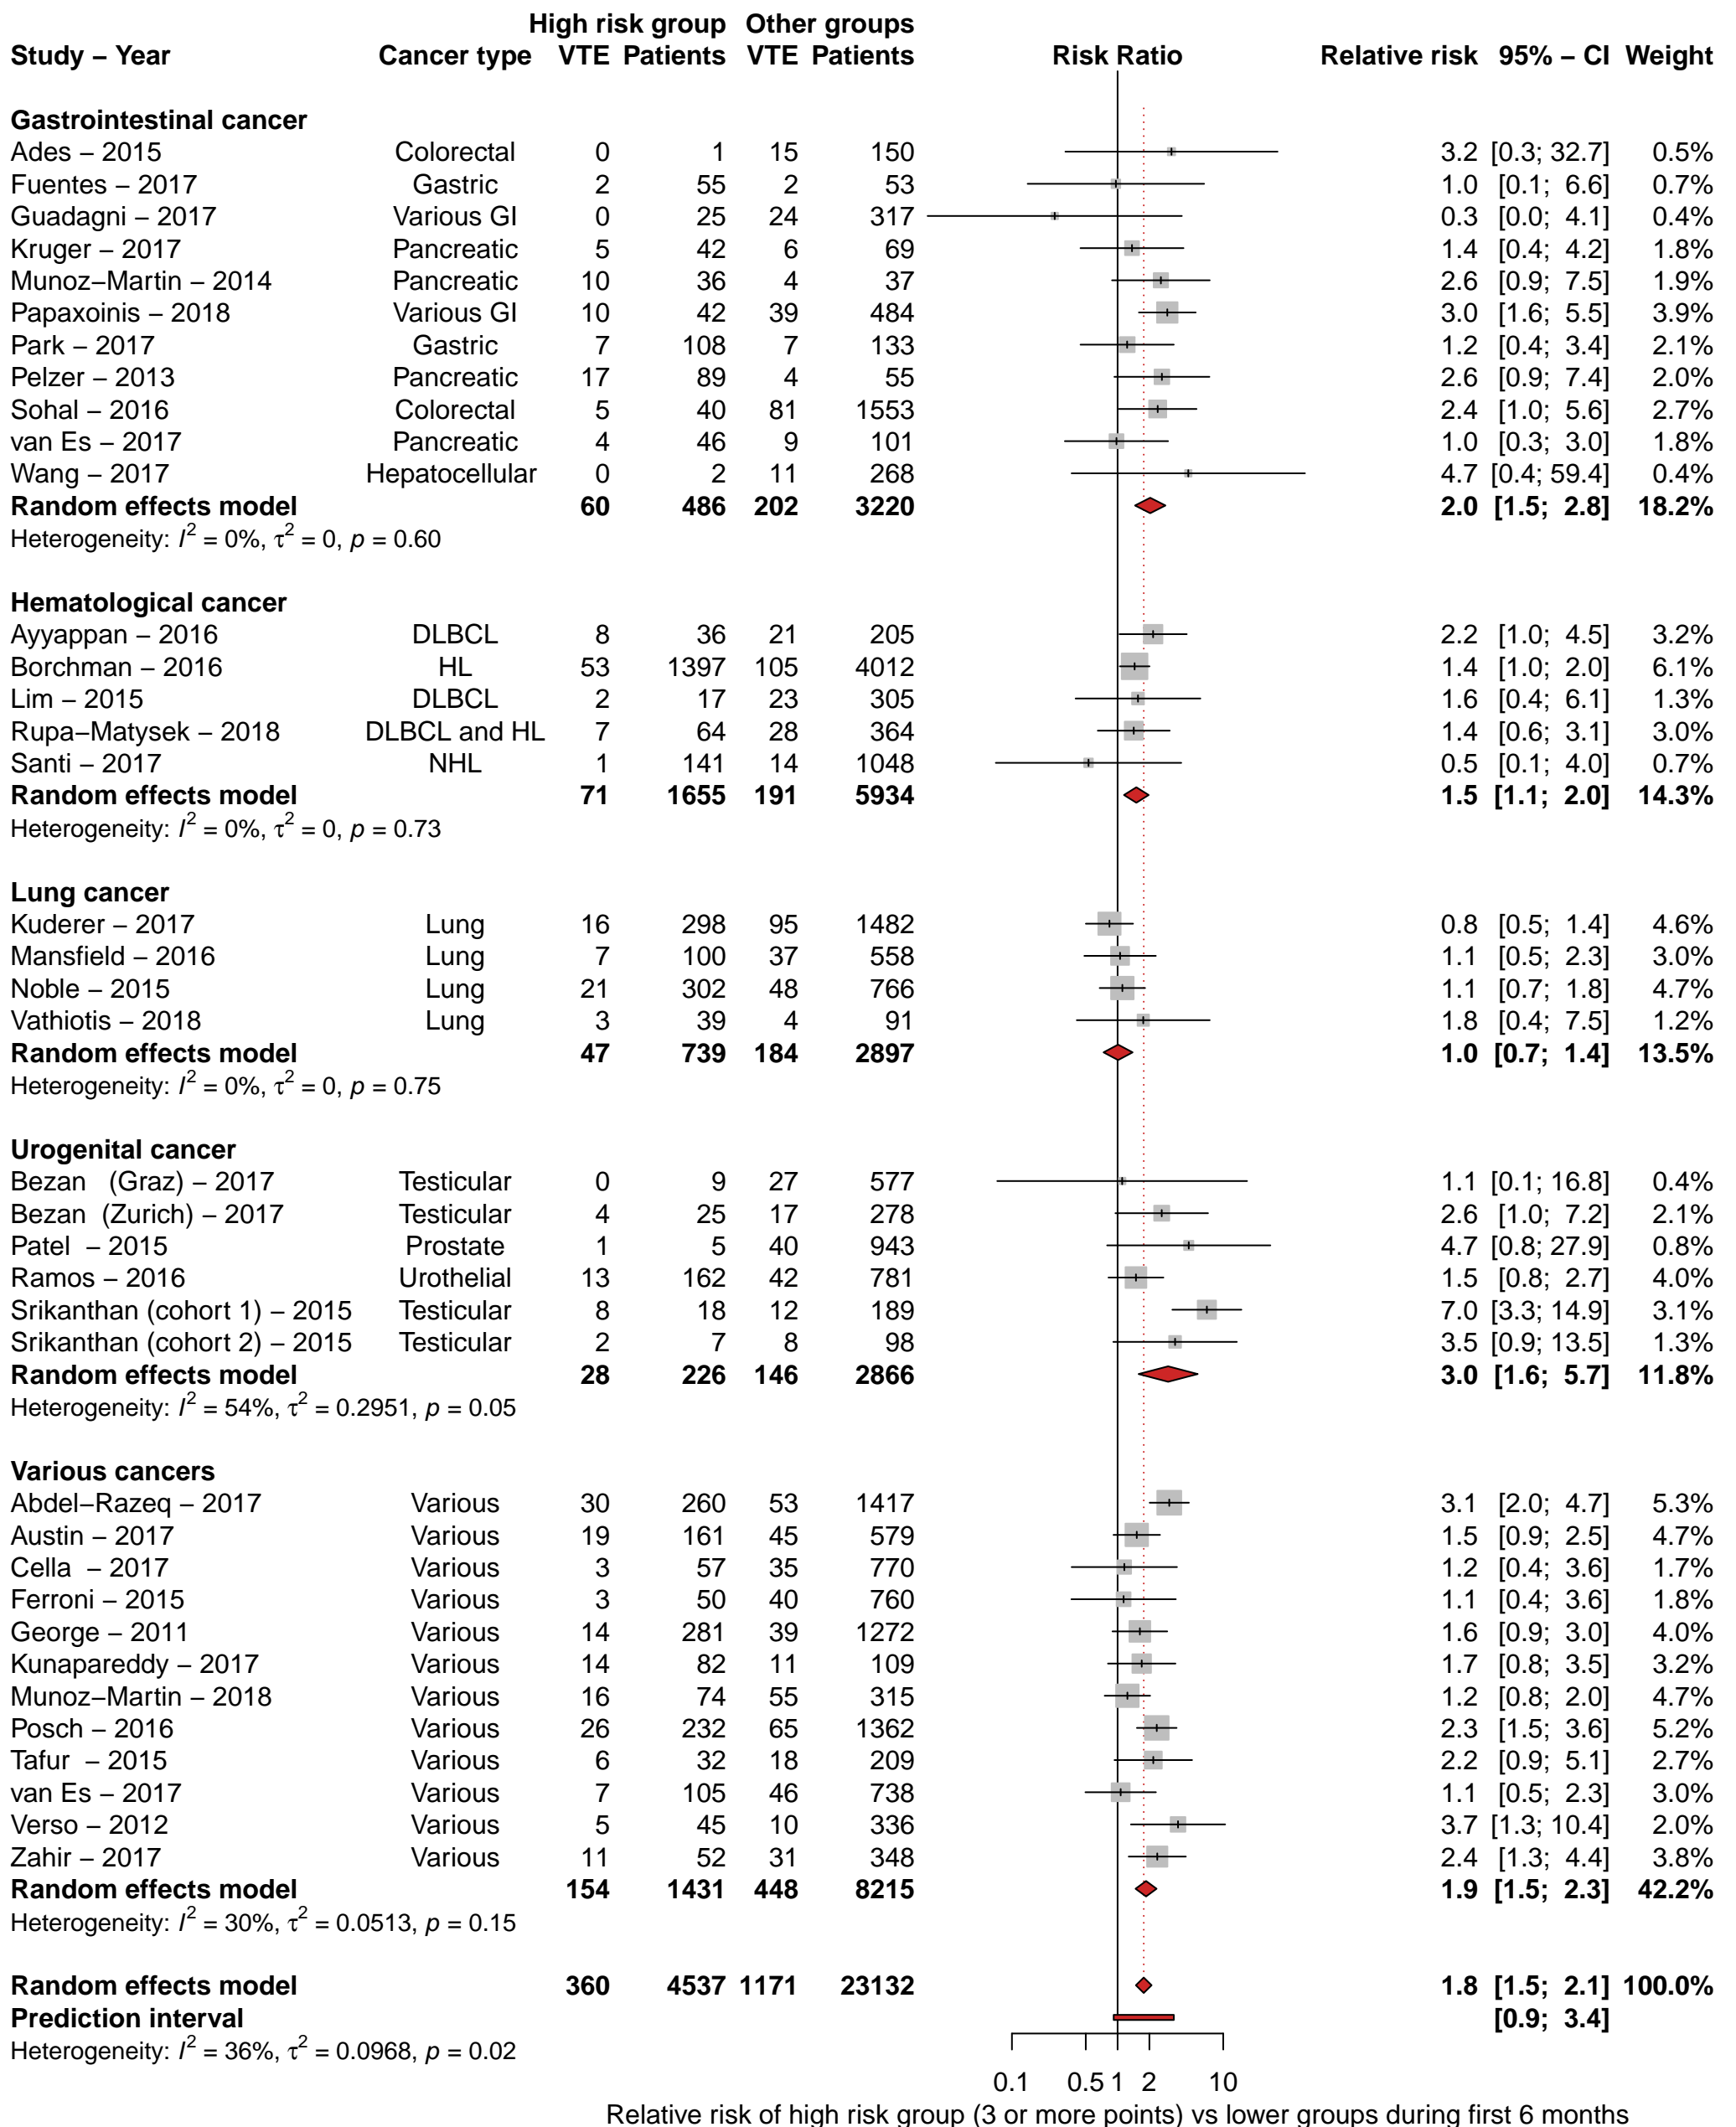



**Supplementary Figure 3A.** VTE incidence with 95% confidence intervals in low-risk group during total follow-up.

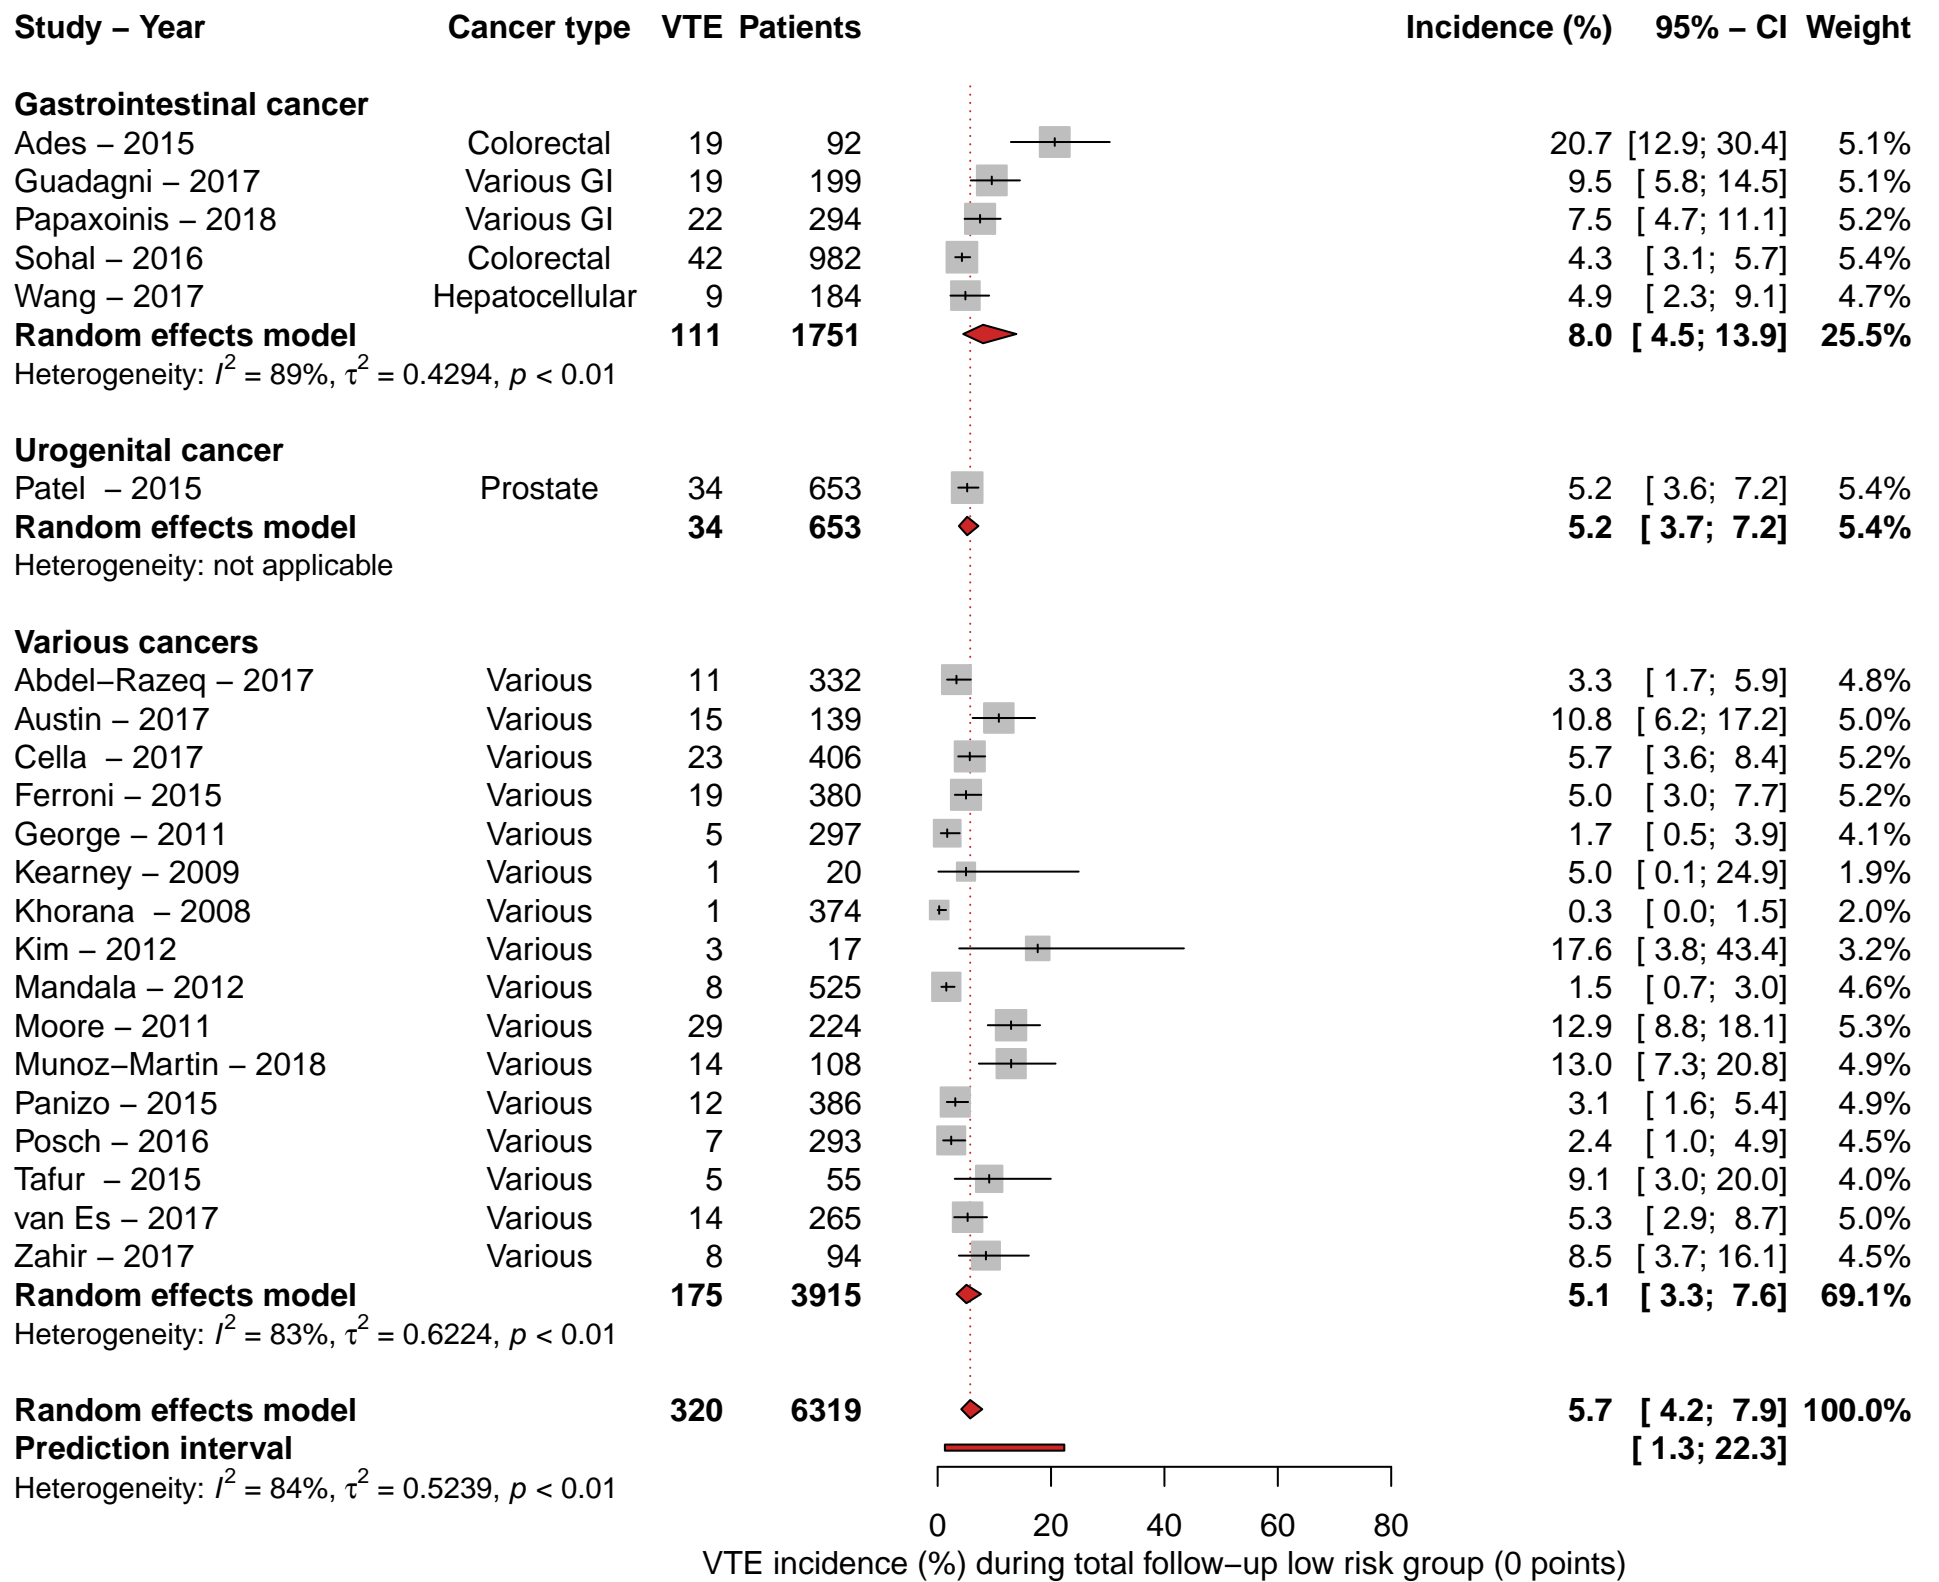

Abbreviations: CI, confidence interval; DLBCL, Diffuse large B-cell lymphoma; HL, Hodgkin lymphoma; NHL, Non-Hodgkin lymphoma; VTE, Venous thromboembolism.

**Supplementary Figure 3B.** VTE incidence with 95% confidence intervals in intermediate-risk group during total follow-up.

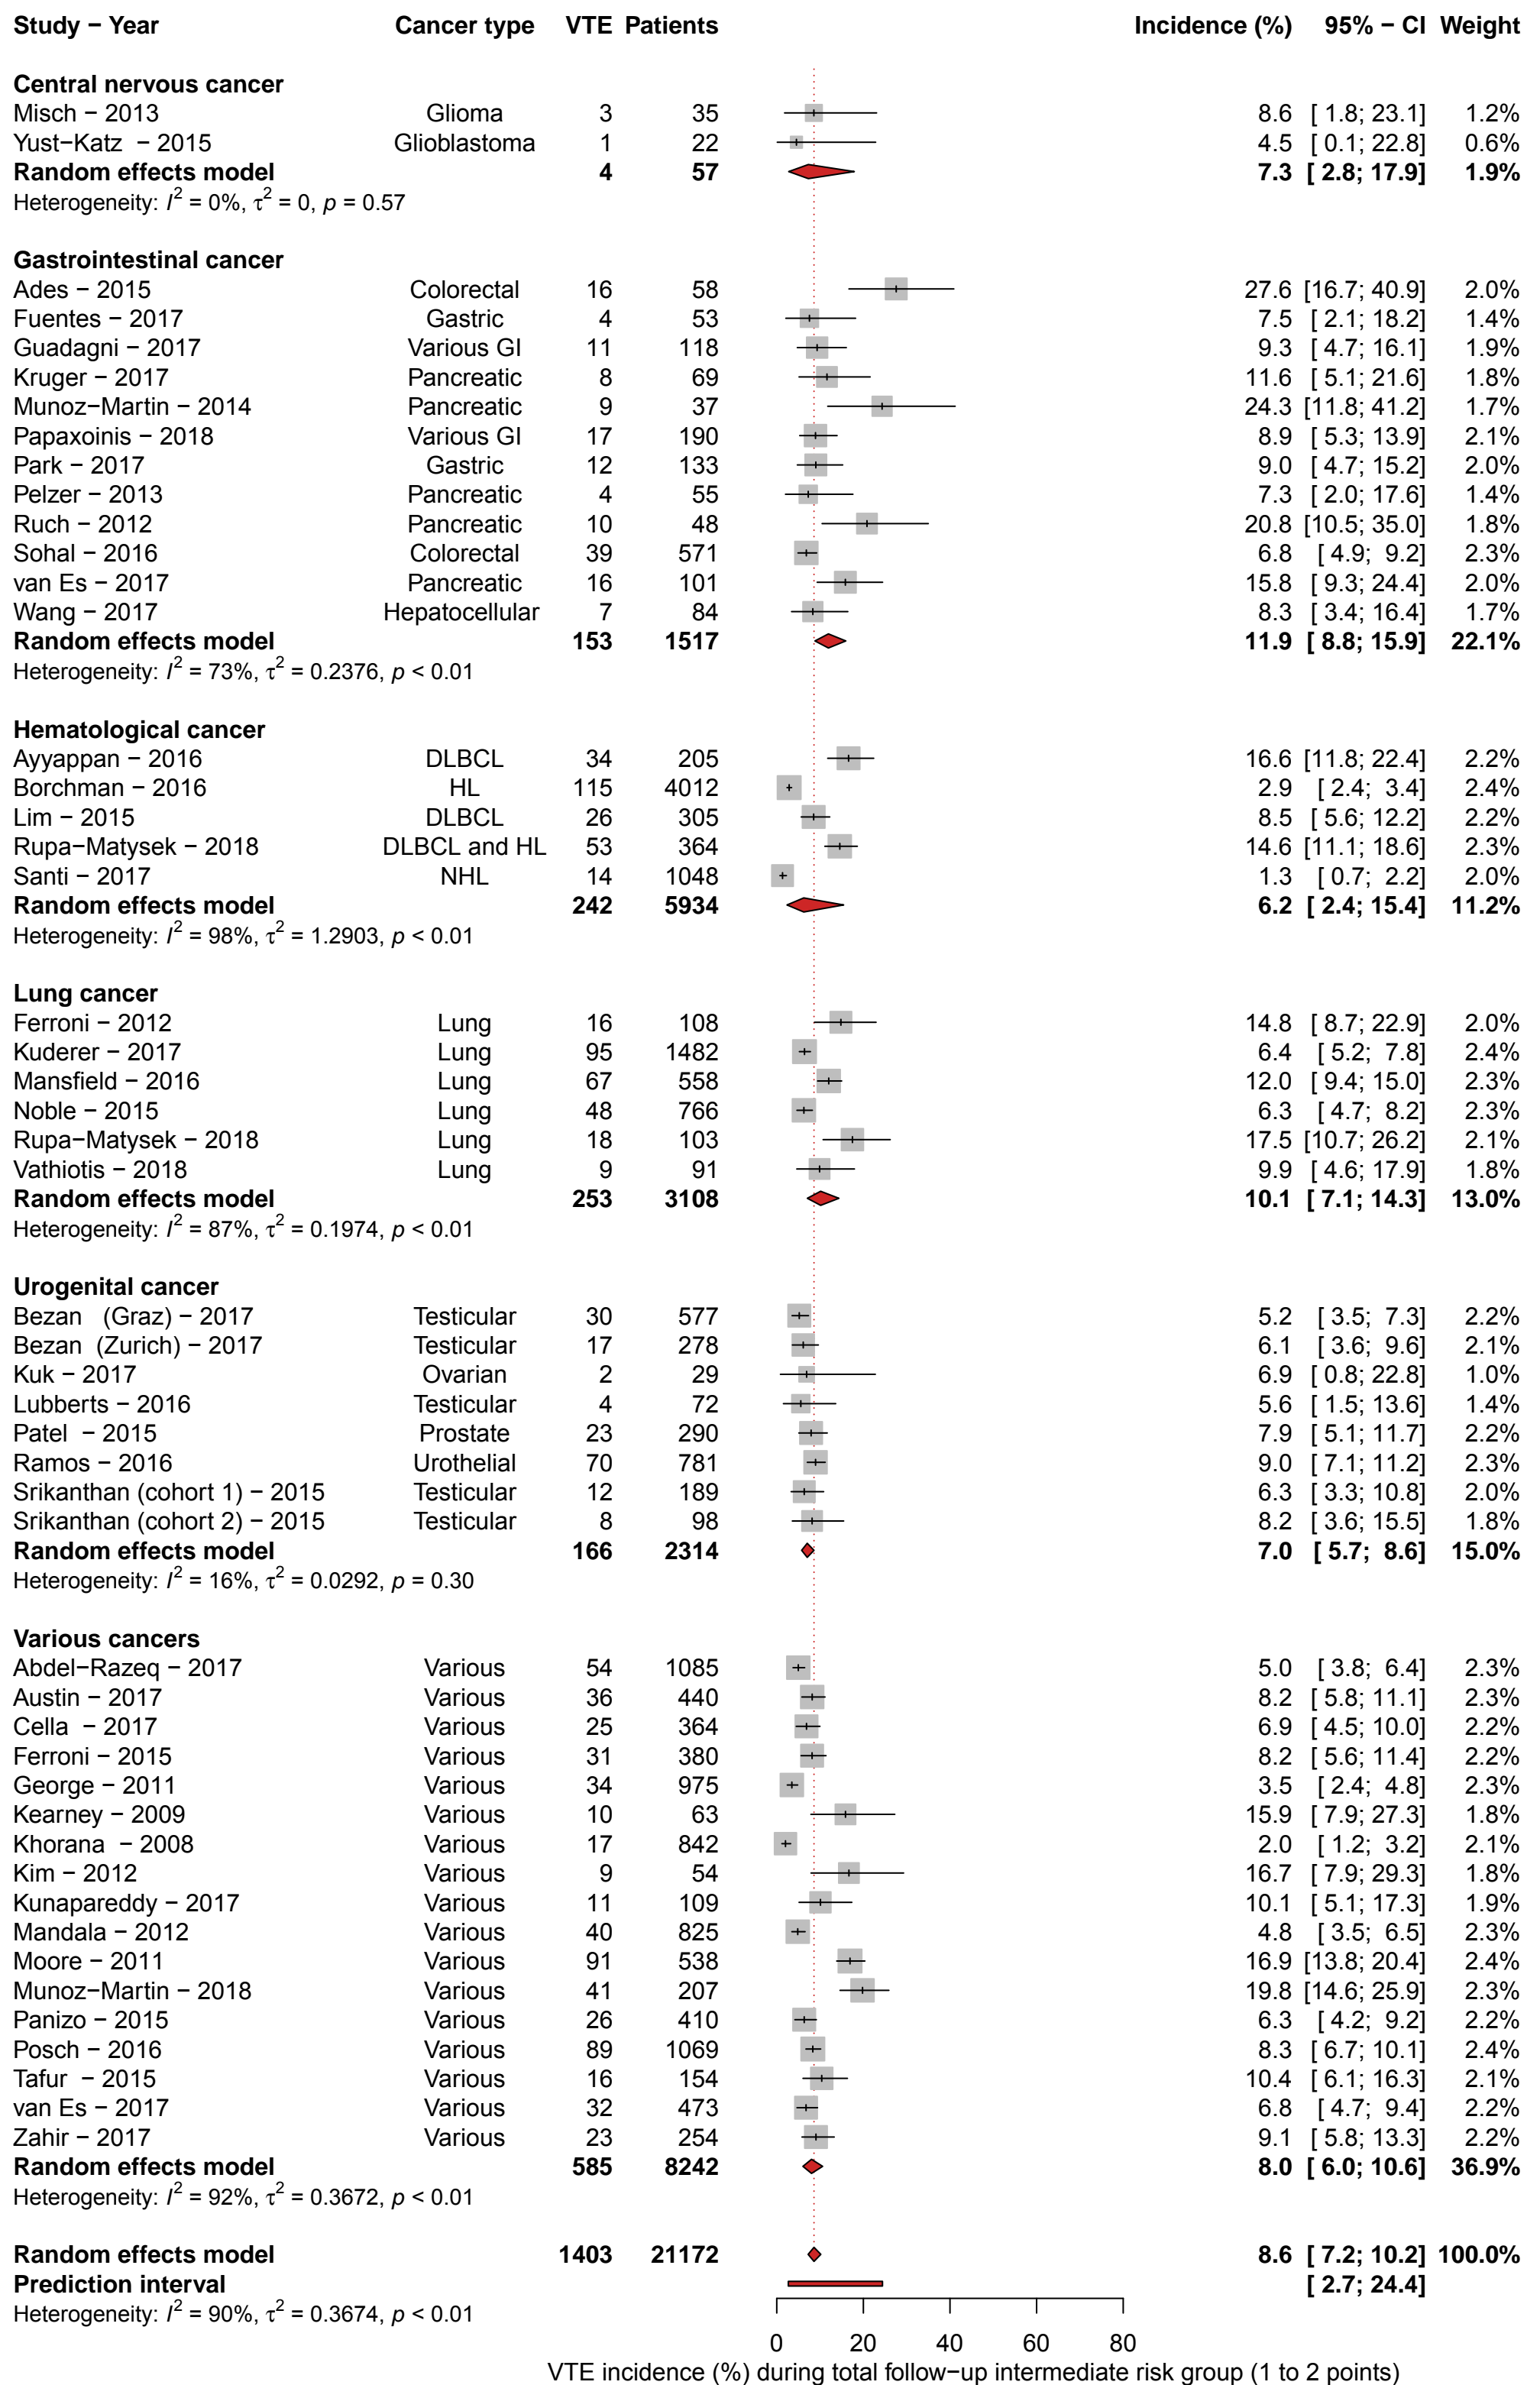

Abbreviations: CI, confidence interval; DLBCL, Diffuse large B-cell lymphoma; HL, Hodgkin lymphoma; NHL, Non-Hodgkin lymphoma; VTE, Venous thromboembolism.

**Supplementary Figure 3C.** VTE incidence with 95% confidence intervals in high-risk group during total follow-up.

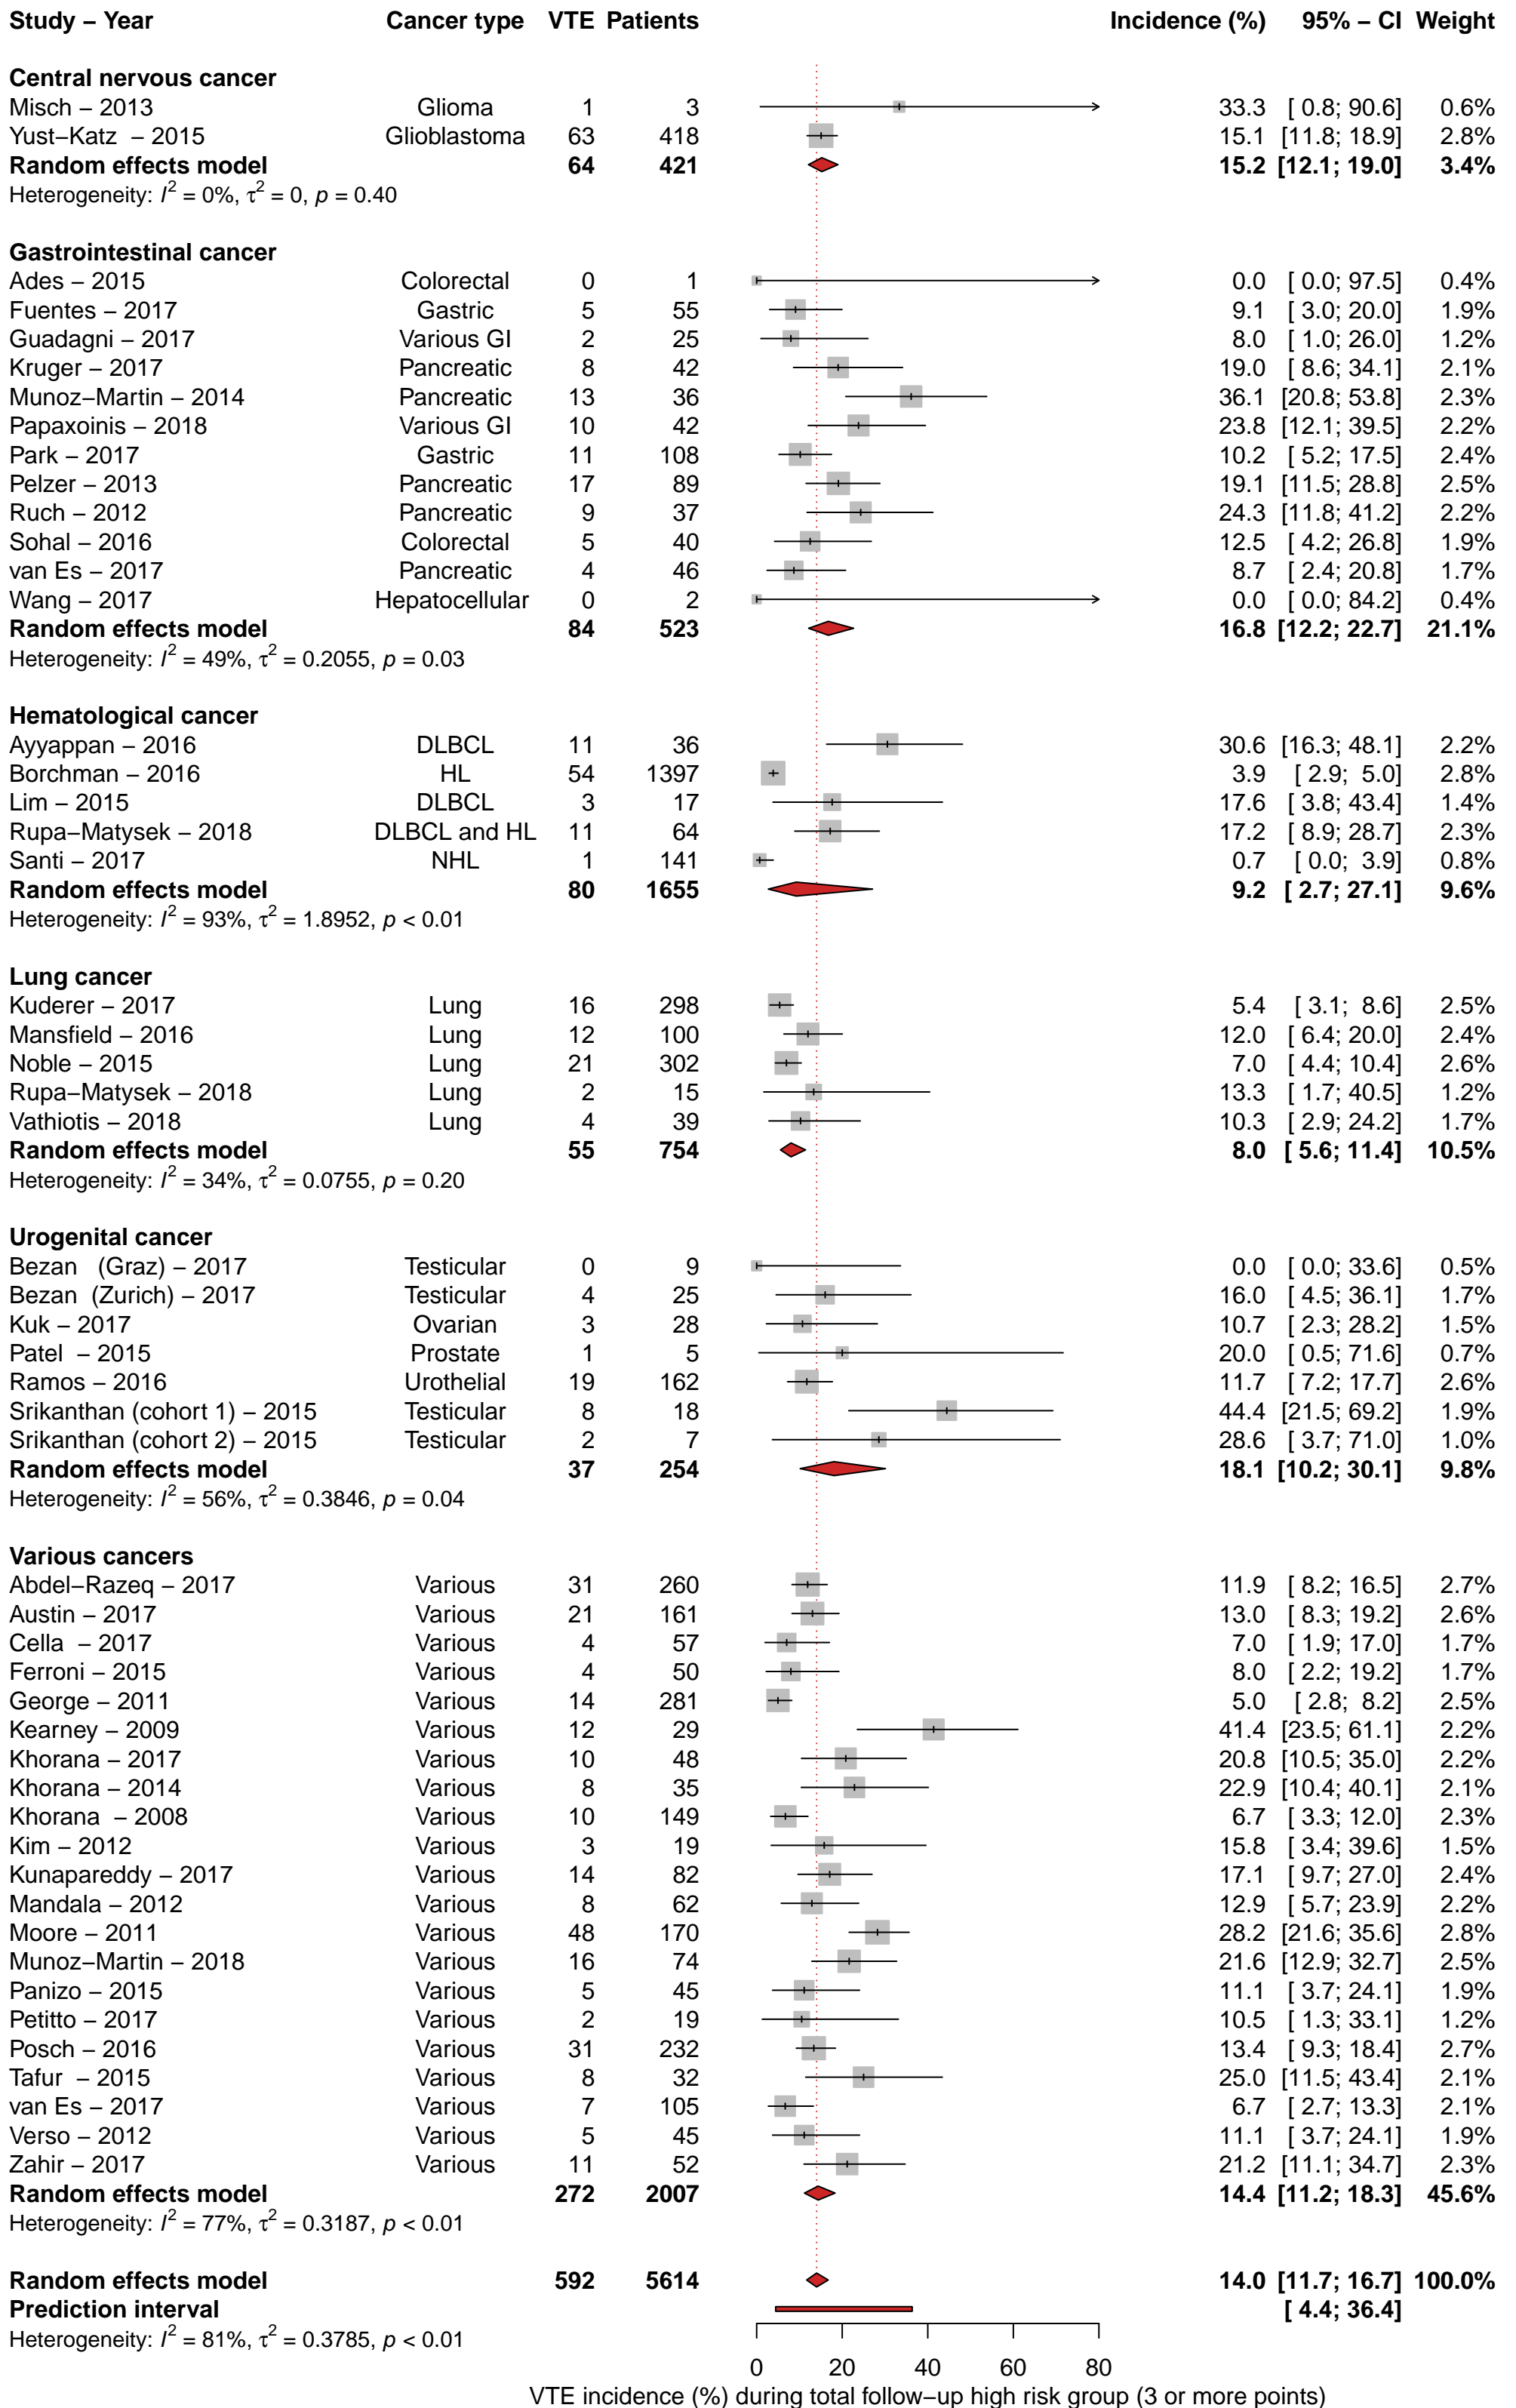

Abbreviations: CI, confidence interval; DLBCL, Diffuse large B-cell lymphoma; HL, Hodgkin lymphoma; NHL, Non-Hodgkin lymphoma; VTE, Venous thromboembolism.

## ***Supplementary list 1***

### ***Data sources and search strategy***

A comprehensive search was performed in Embase and MEDLINE from January 2008 to June 2018 to identify randomized controlled trials, prospective cohort studies, or historical cohort studies that had evaluated the Khorana score in ambulatory cancer patients receiving chemotherapy. Studies that lacked radiological confirmation of VTE, those with a case-control design, and those in languages other than English, French, Dutch, Spanish, or German were excluded. As patients with multiple myeloma are ought to receive a form of thromboprophylaxis<sup>1</sup>, studies that primarily included these patients were excluded. The search strategy is displayed in Supplementary Table 2. In addition, studies presented as abstracts at conferences of the American Society of Hematology (ASH) or the International Society on Thrombosis and Haemostasis (ISTH) from 2008 to 2018 were identified by a manual search. Two reviewers (F.I.M. and M.C.) independently screened studies and assessed bias with the Quality in Prognosis Studies (QUIPS) tool<sup>2</sup>.

### ***Data extraction and bias assessment***

Two reviewers (F.I.M. and M.C.) independently screened titles, abstracts, and full text-articles for potentially eligible studies. Risk of bias assessment and data extraction were performed in duplicate by both reviewers using standardized forms. Discrepancies were solved by discussion. For persisting disagreements, a third reviewer (N.v.E) was consulted.

The Quality in Prognosis Studies (QUIPS) tool<sup>2</sup> was used for risk of bias assessment in the following domains: study participation, study attrition, prognostic factor measurement, outcome measurement, study confounding, and statistical analysis and reporting. Predefined reasons to consider a study as having a high risk of bias for a specific domain included a loss to follow-up of more than 5%, the inability to calculate the Khorana score for more than 10% of the cohort, thromboprophylaxis given to more than 5% of the cohort, start of chemotherapy before calculation of the Khorana score, and inclusion of arterial thromboembolism in the outcome. All criteria applied in the critical appraisal and bias assessment are listed in Supplementary Table 3.

The following variables were extracted from the report of each included study: design, proportion of males, mean or median age at baseline, proportion of patients with metastatic cancer, mean or median follow-up duration, outcomes, and incidence of VTE for all Khorana score groups (low, intermediate, or high risk). For randomized trials evaluating thromboprophylaxis, only patients in the placebo or observation arm were included in present analysis.

### **References supplementary documents**

1. International Myeloma Working Group (IMWG). IMWG Guidelines for the Prevention of Thalidomide- and Lenalidomide-Associated Thrombosis in Myeloma [Epub ahead of print].
2. Hayden J a, Windt D a Van Der, Cartwright JL, Co P. Research and Reporting Methods Annals of Internal Medicine Assessing Bias in Studies of Prognostic Factors. *Ann Intern Med* 2013;144:427–437.
